# Supplementary material
Source: PubMed Central journal article supplement (PMC4224173)
Supplement: aa727e2790a58591519c2e3a723bd7f1_genetics.114.169730-5.pdf [file aa727e2790a58591519c2e3a723bd7f1_genetics.114.169730-5.pdf]

**Table S1 Oligonucleotides used in this study**

**A: Oligonucleotides used for gRNA construction**

| corres p. plasmid | name       | sequence                  | locus                | strand  | use with   | HR or NHEJ observed? |
|-------------------|------------|---------------------------|----------------------|---------|------------|----------------------|
| pJA45             | AF-JA-79   | TCTGTGCCATTAAGTATGTATGT   | <i>rde-1(D718)</i>   | forward | AF-JA-80   | yes                  |
|                   | AF-JA-80   | AAACACATACATAGTTAATGGCAC  | <i>rde-1(D718)</i>   | reverse | AF-JA-79   |                      |
| pJA46             | AF-JA-84   | TCTTGATATTGTAGTCTATCGAGA  | <i>rde-1(D801)</i>   | forward | AF-JA-85   | yes                  |
|                   | AF-JA-85   | AAACTCTCGATAGACTACAATATC  | <i>rde-1(D801)</i>   | reverse | AF-JA-84   |                      |
| pJA14             | AF-JA-6    | TCTTGATAAATGAGCATAATGAAC  | <i>rde-1(H974)</i>   | forward | AF-JA-7    | yes                  |
|                   | AF-JA-7    | AAACGTTCAATTATGCTCATTATC  | <i>rde-1(H974)</i>   | reverse | AF-JA-6    |                      |
| pJA42             | AF-JA-56   | TCTTGTGAGACGTCAACAATATGG  | <i>rol-6(su1006)</i> | forward | AF-JA-57   | yes                  |
|                   | AF-JA-57   | AAACCCATATTGTTGACGTCTCAC  | <i>rol-6(su1006)</i> | reverse | AF-JA-56   |                      |
| pJA52             | AF-JA-105  | TCTTGTGAGACGTCCACAATATGG  | <i>rol-6(su1006)</i> | forward | AF-JA-106  | no                   |
|                   | AF-JA-106  | AAACCCATATTGTTGACGTCTCAC  | <i>rol-6(su1006)</i> | reverse | AF-JA-105  |                      |
| pJA43             | AF-JA-67   | TCTTGCGCGAGTTTTATTAGAAG   | <i>unc-43(n498)</i>  | forward | AF-JA-68   | no                   |
|                   | AF-JA-68   | AAACCTTCTGAATAAACTCGCGC   | <i>unc-43(n498)</i>  | reverse | AF-JA-67   |                      |
| pJA50             | AF-JA-101  | TCTTGTCACGCACATGGTCACTA   | <i>unc-58(e665)</i>  | forward | AF-JA-102  | yes                  |
|                   | AF-JA-102  | AAACTAGTGACCATGTGCGTGGAC  | <i>unc-58(e665)</i>  | reverse | AF-JA-101  |                      |
| pJA44             | AF-JA-72   | TCTTGGGAAACAAATTTTCTTTC   | <i>unc-58(e665)</i>  | forward | AF-JA-73   | no                   |
|                   | AF-JA-73   | AAACGAAAGAAAAATTTGTTTCCC  | <i>unc-58(e665)</i>  | reverse | AF-JA-72   |                      |
| pJA48             | AF-JA-94   | TCTTGTTTTCTTTCAGGTCTTTCCG | <i>unc-58(e665)</i>  | forward | AF-JA-95   | no                   |
|                   | AF-JA-95   | AAACCGGAAAGACCTGAAAGAAAAC | <i>unc-58(e665)</i>  | reverse | AF-JA-94   |                      |
| pJA59             | AF-ZF-821  | TCTTGGAACCTCGTGCAAAACAAC  | <i>unc-109(n499)</i> | forward | AF-ZF-822  | yes                  |
|                   | AF-ZF-822  | AAACGTTGTTTTGACACGAGTTCC  | <i>unc-109(n499)</i> | reverse | AF-ZF-821  |                      |
| pJA58             | AF-ZF-825  | TCTTGCTACCATAGGCACCACGAG  | <i>dpy-10(cn64)</i>  | forward | AF-ZF-826  | yes                  |
|                   | AF-ZF-826  | AAACCTCGTGGTGCCTATGGTAGC  | <i>dpy-10(cn64)</i>  | reverse | AF-ZF-825  |                      |
| pJA54             | AF-JA-109  | TCTTGTGTGGAGTTGGGGTAGCGT  | <i>sqt-1(e1350)</i>  | forward | AF-JA-110  | yes                  |
|                   | AF-JA-110  | AAACACGCTACCCAACTCCACA C  | <i>sqt-1(e1350)</i>  | reverse | AF-JA-109  |                      |
| pJA55             | AF-JA-111  | TCTTGGGAAGGACATAGTTGTCAT  | <i>sqt-1(e1350)</i>  | forward | AF-JA-112  | yes                  |
|                   | AF-JA-112  | AAACATGACAACATATGTCCTTCCC | <i>sqt-1(e1350)</i>  | reverse | AF-JA-111  |                      |
| L8191             | AF-KLA-164 | TCTTGATTGTGACCTTGAAGAGG   | <i>lin-14 C-term</i> | forward | AF-KLA-171 | yes                  |
|                   | AF-KLA-171 | AAACCTCTTCAAGGTCCACAATC   | <i>lin-14 C-term</i> | reverse | AF-KLA-164 |                      |

**B: Donor oligonucleotides for HR**

| name     | sequence                                                                                                       | locus                |
|----------|----------------------------------------------------------------------------------------------------------------|----------------------|
| AF-JA-53 | TGTGGGTTGATATGGTTAAACTTGGAGCAGGAACCGCTTCCAACCGTGTGCGGTGCCAACAATA<br>TGGAGGATATGGAGCCACTGGTGTTCAGCCACCAGCACCAAC | <i>rol-6(su1006)</i> |
| AF-JA-65 | TAAGTTCGATAAAGCTCTTTCGCTTTTTCACATGATAAAGCAGCATAATGAACCGGAACAGGCAA                                              | <i>rde-</i>          |

|           |                                                                                                                                                              |               |
|-----------|--------------------------------------------------------------------------------------------------------------------------------------------------------------|---------------|
|           | CGAGATGGGTTTTTCGACATCTAGCAGAGAGAAAAAG                                                                                                                        | 1(H974)       |
| AF-JA-69  | TTTACTTTTAAATTTACAATTTTCTATCCGAAATACTCACCTTGCATCCGCCTTTGAATAAAACTCGC<br>GAGCAACAATGTCCTCAAACAGTTCTCCTCCGGTAAC                                                | unc-43(n498)  |
| AF-JA-76  | ATTTTGTGGTATAAAAATAGCCGAGTTAGGAAACAAATTTTCTTTTCAGGTTTCTCAGTAGTGACCA<br>TGTGCGTGGATCTTGCCTCCACACATCTCAAGGCGTACTT                                              | unc-58(e665)  |
| AF-JA-81  | ATATCACCAGAAGAAAAAGAAAGACGGAAACAATGCCATTAACATGTACGTAGGAATTGCTG<br>TAACTCATCCAACCTCCTACAGTGAATTGATTATTCTATAGCGGCTG                                            | rde-1(D718)   |
| AF-JA-86  | CTTTCAGAACAACGACAATCGAGCACCAGCGCATATTGTAGTCTATCGAG CCGGC<br>GTTAGCGATTCGGAGATGCTACGTGTTAGTCATGATGAGCTTCGATCTTT                                               | rde-1(D801)   |
| AF-JA-91  | GGGGATCCATCAGCATGTGGAGTTGGGGTAGCGTGTGCTCTTTCATATTGGCAGCGGACACGCT<br>TGCTAGATCTTCCGATGACAACATGTCCCTCCACAATCC                                                  | sqt-1(e1350)  |
| AF-JA-113 | TTGACTGGTGGAGCAGATGGGATCCATCAGCATGTGGAGTTGGGGTAGCGTTCGTTCTCTTCA<br>TATTGGCAGCGGACACGCTTGTAGATCTTCCGATAAACCATATGTCCTTCCACAATCCATTGGTA<br>GATTGCTAGAAAATTAATAA | sqt-1(e1350)  |
| AF-JA-116 | CAGCCGCTATAGAATAATCAATTCCTACTGTAGGAGTTGGATGAGTTACAGCAATTCCTACGTAC<br>ATAGTTAATGGCATTGTTTTCCGCTTTCTTTTCTTCTGGTGATAT                                           | rde-1(D718)   |
| AF-ZF-827 | CACTTGAACCTCAATACGGCAAGATGAGAATGACTGGAAACCGTACCGCATGCGGTGCCTATGG<br>TAGCGGAGCTTACATGGCTTACAGCAACAGCCTAT                                                      | dpy-10(cn64)  |
| AF-ZF-820 | GAAAGGTTAGGAGAGGCAATATATCAACCAACTGAGCAAGATATTCTCGAACATGTGTAATAA<br>CTACTGGTATTGTTGAAGTTCACCTTACATTCAAAAATCTCAATTTCAAGTGAG                                    | unc-109(n499) |

#### C: Oligonucleotides for single worm PCR

| name       | sequence                   | locus                | use with   |
|------------|----------------------------|----------------------|------------|
| AF-JA-54   | GCCATTGTATTTTCTGGAGCCAC    | <i>rol-6(su1006)</i> | AF-JA-55   |
| AF-JA-55   | CTCCACGTGGTCCTCCTCCATTC    | <i>rol-6(su1006)</i> | AF-JA-54   |
| AF-JA-77   | TGCTGTAAACAATGGGAGGAGG     | <i>rde-1(H974)</i>   | AF-JA-78   |
| AF-JA-78   | AGATATGATGCTCACGTTCAAACG   | <i>rde-1(H974)</i>   | AF-JA-77   |
| AF-JA-82   | GCCAAATGAAAACAGAGGAGCGCA   | <i>rde-1(D718)</i>   | AF-JA-83   |
| AF-JA-83   | ATCTTTATTGACCACTGGCTTATC   | <i>rde-1(D718)</i>   | AF-JA-82   |
| AF-JA-87   | AGTCACAAAAGCTTTGGCATCAC    | <i>rde-1(D801)</i>   | AF-JA-88   |
| AF-JA-88   | ATCTAAAATCGCTAACTGCTATTC   | <i>rde-1(D801)</i>   | AF-JA-87   |
| AF-JA-96   | CGGAGATATCGTTGTGACTGATTAC  | <i>unc-58(e665)</i>  | AF-JA-75   |
| AF-JA-75   | CTGACTGGAAGGAATTGTGACGGA   | <i>unc-58(e665)</i>  | AF-JA-96   |
| AF-JA-70   | CAAACAAGTGACAAACCTTCAAGTC  | <i>unc-43(n498)</i>  | AF-JA-71   |
| AF-JA-71   | GAAGCTCAAAGTTTCAAACACG     | <i>unc-43(n498)</i>  | AF-JA-70   |
| AF-ZF-823  | GATGTGGTGGCAGCAATGGAGGACAC | <i>unc-109(n499)</i> | AF-ZF-824  |
| AF-ZF-824  | AATTTCTACTGTTGTCTCATCTTC   | <i>unc-109(n499)</i> | AF-ZF-823  |
| AF-ZF-831  | GTCAGATGATCTACCGGTGTGTCAC  | <i>dpy-10(cn64)</i>  | AF-ZF-832  |
| AF-ZF-832  | GTCTCTCCTGGTCTCCGTCTTAC    | <i>dpy-10(cn64)</i>  | AF-ZF-831  |
| AF-JA-92   | GCGTCGCGTCCCTTCTCTCCTG     | <i>sqt-1(e1350)</i>  | AF-ZF-93   |
| AF-JA-93   | ACATCCGACTCCTTATCTCCCG     | <i>sqt-1(e1350)</i>  | AF-ZF-92   |
| AF-KLA-175 | ACTCGAACTATGCAAATCTTC      | <i>lin-14 C-term</i> | AF-KLA-176 |
| AF-KLA-176 | GAGATACTACAATGTGCGAA       | <i>lin-14 C-term</i> | AF-KLA-175 |

#### D: Oligonucleotides for *rde-1* PCR donor construct and screening

| name      | sequence                  | raison d'etre                                                        |
|-----------|---------------------------|----------------------------------------------------------------------|
| AF-JA-21  | AAACATCTTTATGAAACCGTTATC  | reverse PCR primer for <i>rde-1</i> donor PCR product, with AF-JA-82 |
| AF-ZF-438 | GTGTAAGTGTTTTCTACGTAGATT  | with AF-JA-82, forward PCR primer for screening for integration      |
| AF-JA-36  | GTGAGTACCAATGAGCGATGTCATC | with AF-JA-77, reverse PCR primer for screening for integration      |
